# Supplementary material for: Asymmetric Sulfoxidation by a Tyrosinase Biomimetic Dicopper Complex with a Benzimidazolyl Derivative of L-Phenylalanine
Source: MDPI journal article supplement (doi:10.3390/molecules28114487), 2023-06-01
Supplement: s1 [file s1]

## Supporting information

### Asymmetric sulfoxidation by a tyrosinase biomimetic dicopper complex with a benzimidazolyl derivative of L-phenylalanine

Elia Lo Presti,<sup>1</sup> Fabio Schifano,<sup>1</sup> Chiara Bacchella,<sup>1</sup> Laura Santagostini,<sup>2</sup> Luigi Casella<sup>1</sup> and Enrico Monzani<sup>1\*</sup>

<sup>1</sup> Dipartimento di Chimica, Università di Pavia, Via Taramelli 12, 27100 Pavia, Italy

<sup>2</sup> Dipartimento di Chimica, Università di Milano, Via Golgi 19, 20133 Milano, Italy

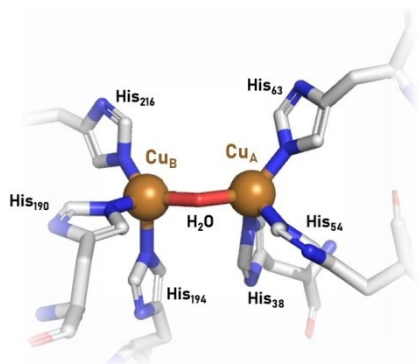

**Figure S1.** X-ray crystal structure of the active site of the Met1-form (one water molecule) of *S. castaneoglobisporus* tyrosinase (this tyrosinase does not have the His-Cys crosslink present in other tyrosinases).

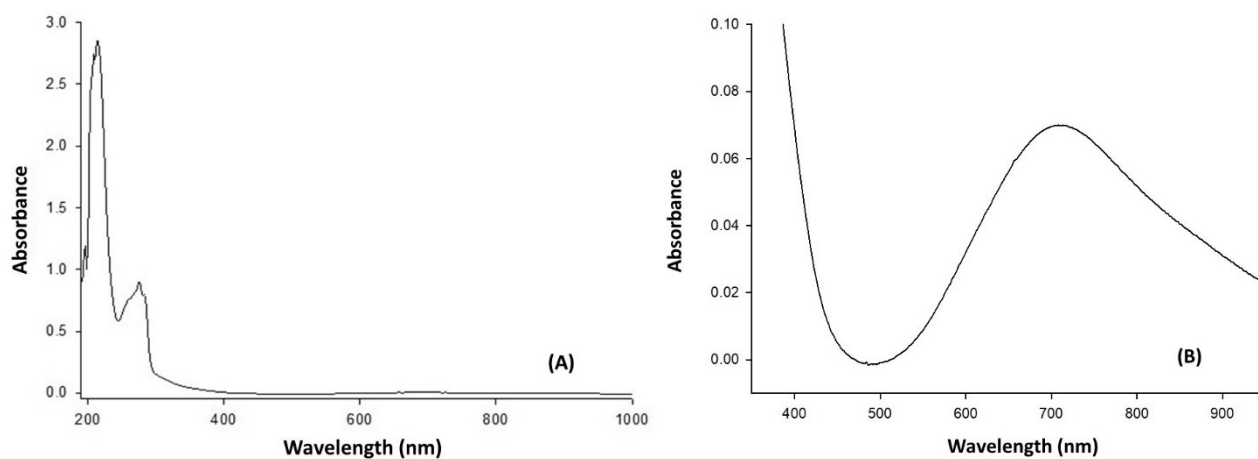

**Figure S2.** UV-Vis electronic spectrum of  $[\text{Cu}_2(\text{mXPhI})]^{4+}$  in methanol solution: (A) in the UV range 0.1 mM concentration, and (B) in the Visible region 0.5 mM concentration of the complex.

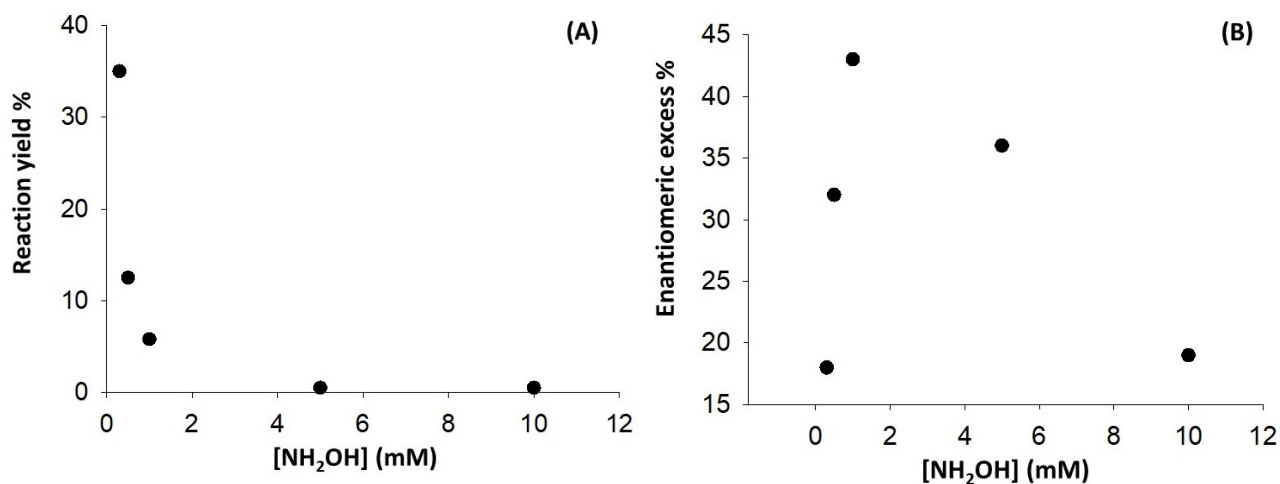

**Figure S3.** Reaction yield (A) and enantiomeric excess trend (B) in oxidation of thioanisole promoted by [Cu<sub>2</sub>(mXPhI)]<sup>4+</sup>

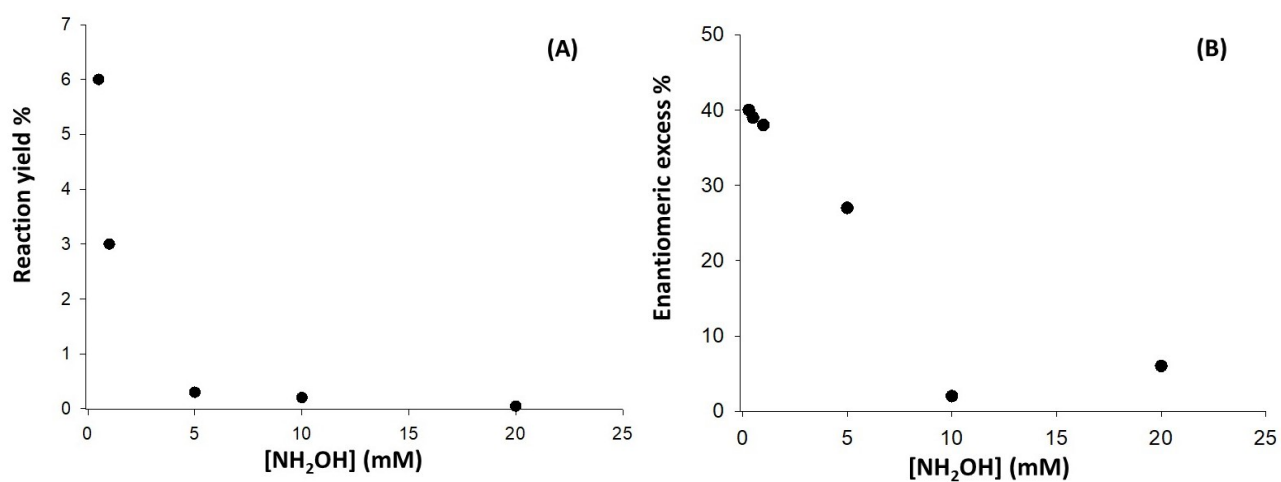

**Figure S4.** Reaction yield (A) and enantiomeric excess trend (B) in oxidation of methyl *p*-tolyl sulfide promoted by [Cu<sub>2</sub>(mXPhI)]<sup>4+</sup>

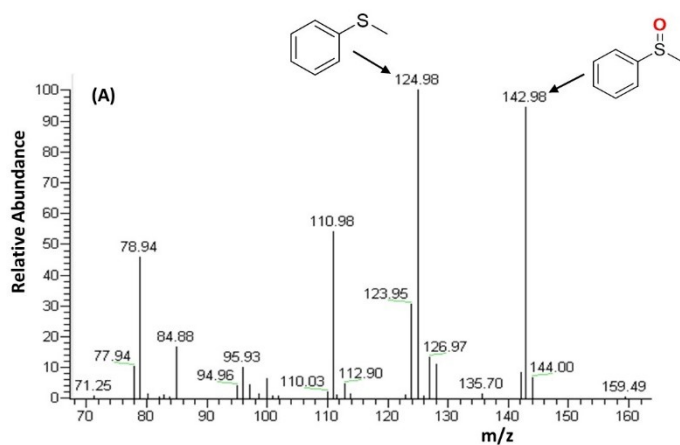

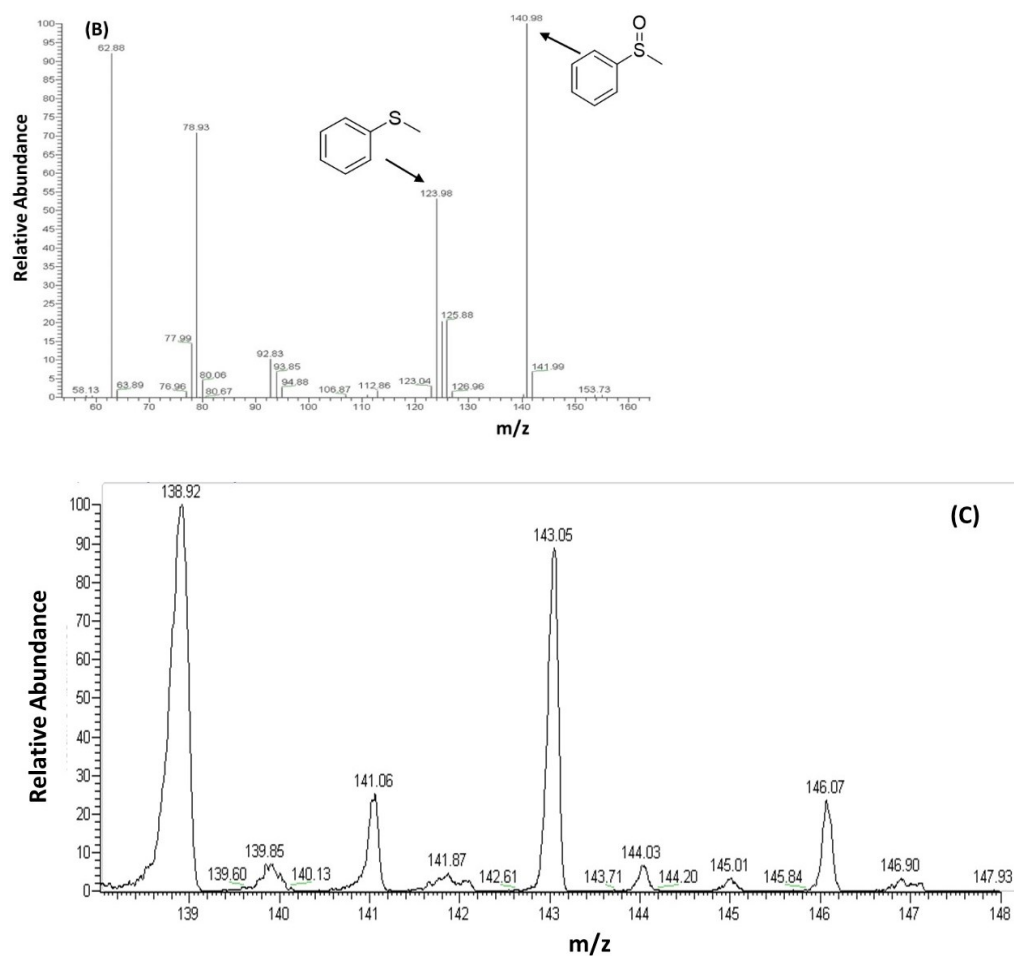

**Figure S5.** Sulfoxidation of thioanisole in presence of oxygen-18; (A) Fragmentation pattern of the methylphenyl sulfoxide including O-18 (18-O-methylphenyl sulfoxide:  $m/z$  = +143); (B) Fragmentation pattern of commercial methylphenyl sulfoxide (methylphenyl sulfoxide:  $m/z$  = +141); (C) Enlargement of the ESI-MS spectrum.

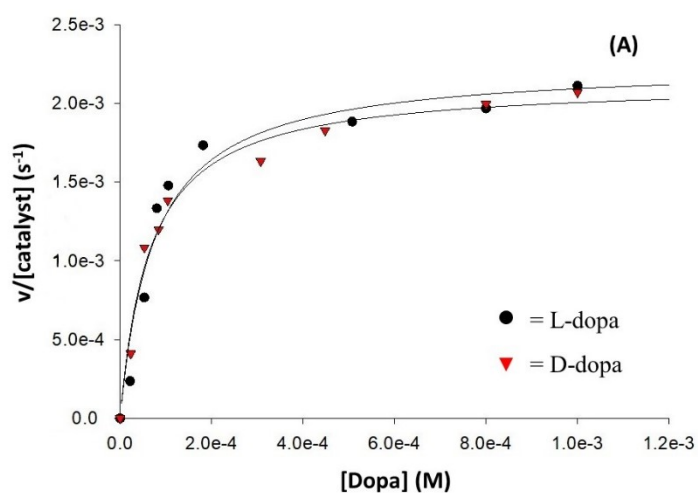

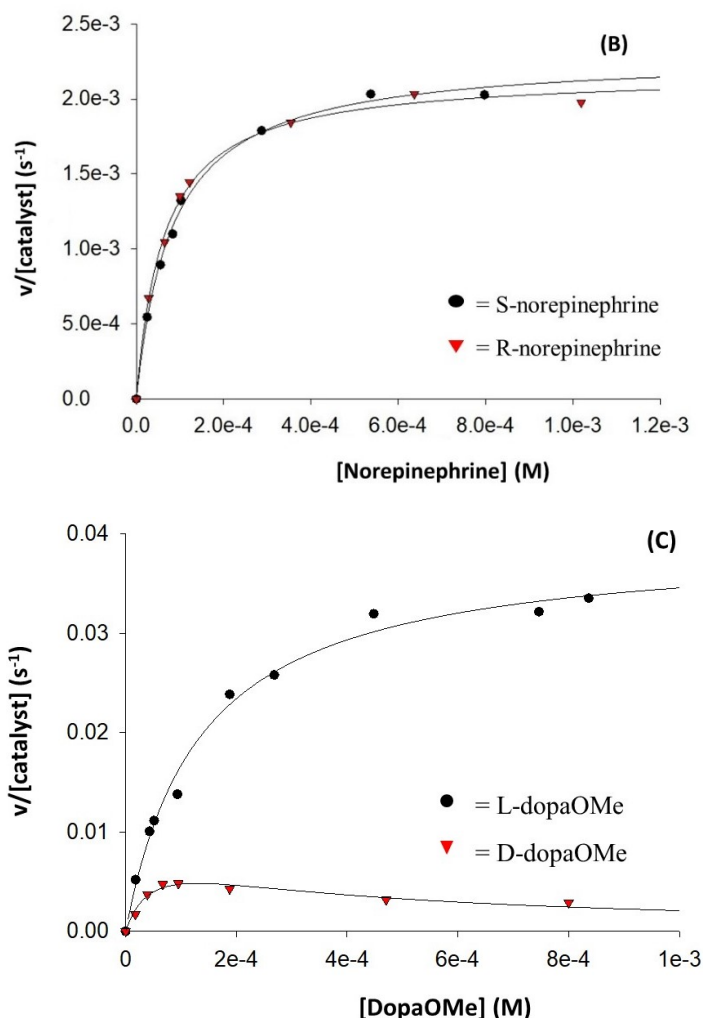

**Figure S6.** Effect of substrate concentration on initial rate of oxidation of A) L-/D-Dopa, B) R-/S-norepinephrine, C) L-/D-DopaOMe promoted by  $[Cu_2(mXPhI)]^{4+}$  5  $\mu$ M, in 10:1 MeOH:acetate buffer (50 mM, pH = 5.1), temperature: 25 °C.

#### Derivation of the kinetic equation to describe D-Dopa methyl ester inhibition effect:

The kinetic equation describing the biphasic behavior observed in the catecholase activity of  $[Cu_2(mXPhI)]^{4+}$  (here indicated as C) toward D-Dopa (indicated as S) can be obtained considering that the complex binds two substrate molecules in a stepwise process forming CS (the copper complex bound by one S molecule) and  $CS_2$  (the complex bound by two S molecules). Both CS and  $CS_2$  are active in the product (P) formation but with different rate constants.

Assuming the following equilibria:

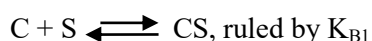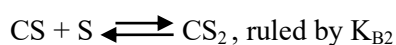

and

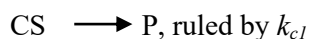

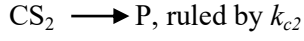

Indicating with  $[C_0]$  the initial  $[\text{Cu}_2(\text{mXPhI})]^{4+}$  concentration in the catalysis, the mass balance leads to the following equation:

$$[C_0] = [C] + [CS] + [CS_2]$$

appropriate substitutions give

$$[C_0] = [C] + K_{B1} \times [C] \times [S] + K_{B2} \times [CS] \times [S] = [C] + K_{B1} \times [C] \times [S] + K_{B1} \times K_{B2} \times [C] \times [S]^2$$

so

$$[C] = \frac{[C_0]}{1 + K_{B1} \times [S] + K_{B1} \times K_{B2} \times [S]^2} \quad ; \quad [CS] = \frac{K_{B1} \times [S] \times [C_0]}{1 + K_{B1} \times [S] + K_{B1} \times K_{B2} \times [S]^2} \quad ; \quad [CS_2] = \frac{K_{B1} \times K_{B2} \times [C_0] \times [S]^2}{1 + K_{B1} \times [S] + K_{B1} \times K_{B2} \times [S]^2}$$

The substitution of  $[CS]$  and  $[CS_2]$  in the rate kinetic equation ( $r = k_{c1} \times [CS] + k_{c2} \times [CS_2]$ ) leads to:

$$r = \frac{k_{c1} \times K_{B1} \times [S] \times [C_0] + k_{c2} \times K_{B1} \times K_{B2} \times [C_0] \times [S]^2}{1 + K_{B1} \times [S] + K_{B1} \times K_{B2} \times [S]^2}$$

Dividing for  $[C_0]$  and  $K_{B1}$  we obtained the final equation (where  $K_M = 1 / K_{B1}$ ):

$$r/[C_0] = \frac{k_{c1} \times [S] + k_{c2} \times K_{B2} \times [S]^2}{K_M + [S] + K_{B2} \times [S]^2}$$
